# Supplementary material for: Alveolar macrophages in early stage COPD show functional deviations with properties of impaired immune activation
Source: Front Immunol. 2022 Jul 28;13:917232. doi: 10.3389/fimmu.2022.917232 (PMC9377018; doi:10.3389/fimmu.2022.917232)
Supplement: Supplementary file 14 [file Table_7.xlsx]

## Sheet: antibodies
Antibody	Vendor	Vendor's address	Identifier
PE-Cy7 anti-human CD45	Biolegend	London, UK	Cat#304016; RRID: AB_314404
PE anti-human CD66b	Biolegend	London, UK	Cat#305106; RRID: AB_2077857
APC-Cy7 anti-human CD3	Biolegend	London, UK	Cat#300470; RRID: AB_2629689
APC-Cy7 anti-human CD19	Biolegend	London, UK	Cat#302258; RRID: AB_2629691
APC-Cy7 anti-human CD56	Biolegend	London, UK	Cat#362554; RRID: AB_2572105
APC anti-human HLA-A,B,C	Biolegend	London, UK	Cat#311414; RRID: AB_493135
APC anti-human HLA-DR,DP,DQ	Biolegend	London, UK	Cat#361704; RRID: AB_2563169
AF647 anti-human HLA-DR	Biolegend	London, UK	Cat#307622; RRID: AB_493177
APC anti-human CD74	Biolegend	London, UK	Cat#326812; RRID: AB_2564389
BV711 anit-human CD45	Biolegend	London, UK	Cat#304050; RRID: AB_2563466
APC anti-human CD19	Biolegend	London, UK	Cat#302212; RRID: AB_314242
APC-Cy7 anti-human CD14	Biolegend	London, UK	Cat#325620; RRID: AB_830693
BV605 anti-human CD16	Biolegend	London, UK	Cat#302039; RRID: AB_2561354
PerCP/Cy5.5 anti-human HLA-DR	Biolegend	London, UK	Cat#307630; RRID: AB_893567
PE/Dazzle anti-human CD203c	Biolegend	London, UK	Cat#324623; RRID: AB_2566234
PE/Cy7 anti-human Siglec-8	Biolegend	London, UK	Cat#347112; RRID: AB_2629720
AF700 anti-human FcεRIα	Biolegend	London, UK	Cat#334630; RRID: AB_2571902
FITC anti-human CD66b	Biolegend	London, UK	Cat#305104; RRID: AB_314496
FITC anti-human CD11c	Biolegend	London, UK	Cat#301604; RRID: AB_314174
PE-Cy7 anti-human CD3	Biolegend	London, UK	Cat#300420; RRID: AB_439781
PerCP/Cy5.5 anti-human CD4	Biolegend	London, UK	Cat#300530; RRID: AB_893322
BV650 anti-human CD8	Biolegend	London, UK	Cat#344730; RRID: AB_2564510
APC anti-human CRTH2	Biolegend	London, UK	Cat#350110; RRID: AB_11203707
AF647 anti-human CD3	BD	Heidelberg, Germany	Cat#557706; RRID: AB_396815
AF647 anti-human CD56	BD	Heidelberg, Germany	Cat#557711; RRID: AB_396820
BV421 anti-human CD117	BD	Heidelberg, Germany	Cat#562434; RRID: AB_11154222
FITC anti-human CD33	BD	Heidelberg, Germany	Cat#555626; RRID: AB_395992
FITC anti-human CD123	BD	Heidelberg, Germany	Cat#558663; RRID: AB_1645485
BV510 anti-human CD56	BD	Heidelberg, Germany	Cat#563041; RRID: AB_2732786
PE anti-human CD127	BD	Heidelberg, Germany	Cat#557938; RRID: AB_2296056
FITC anti-human CD14	BD	Heidelberg, Germany	Cat#130-110-520; RRID: AB_2655053

## Sheet: chemicals
Chemical	Vendor	Vendor's address	Identifier
CFSE	eBioscience	MA, USA	Cat#65-0850
Chitosan	Sigma	Roedermark, Germany	Cat#C3646
Chitin Resin	NEB	Frankfurt am Main, Germany	Cat#S6651L
Recombinant human CCL3	R&D	Abingdon, UK	Cat#279-LD-010
Rotenone	Sigma	Roedermark, Germany	Cat#R8875-1G
Oligomycin	Sigma	Roedermark, Germany	Cat#75351-5MG
FCCP	Sigma	Roedermark, Germany	Cat#C2920-10MG
Antimycin A	Sigma	Roedermark, Germany	Cat#A8674-25MG
Crystal violet solution	Sigma	Roedermark, Germany	Cat#V5265
Cholesterol-d6	Avanti	AL, USA	Cat#700172
CL(56:0)	Avanti	AL, USA	Cat#710332
LPC(17:1)	Avanti	AL, USA	Cat#855677
Ceramide(17:0)	Avanti	AL, USA	Cat#860517
SM(17:0)	Avanti	AL, USA	Cat#860585
GlcCer(12:0)	Avanti	AL, USA	Cat#860543
GM3(18:0-d3)	Matreya	AL, USA	Cat#2052
PG(28:0)	Sigma	Roedermark, Germany	Cat#P6412
LPA(17:0)	Avanti	AL, USA	Cat#857127
LPE(17:1)	Avanti	AL, USA	Cat#856707
PA(31:1)	in-house synthesis (Christoph Thiele)		N/A
PC(31:1)	in-house synthesis (Christoph Thiele)		N/A
PE(31:1)	in-house synthesis (Christoph Thiele)		N/A
PI(34:0)	in-house synthesis (Christoph Thiele)		N/A
PS(31:1)	in-house synthesis (Christoph Thiele)		N/A
TG(47:1)	in-house synthesis (Christoph Thiele)		N/A
CE(17:1)	in-house synthesis (Christoph Thiele)		N/A
MAG(17:1)	in-house synthesis (Christoph Thiele)		N/A
DG(31:1)	in-house synthesis (Christoph Thiele)		N/A
Acyl-Carn(15:0)	in-house synthesis (Christoph Thiele)		N/A

## Sheet: commercial assays
Commercial Assay	Vendor	Vendor's address	Identifier
CD45 Microbeads, human	Miltenyi Biotec	Bergisch Gladbach, Germany	Cat#130-045-801
StraightFrom™ Whole Blood CD66b MicroBeads, human	Miltenyi Biotec	Bergisch Gladbach, Germany	Cat#130-104-913
Whole Blood Column Kit	Miltenyi Biotec	Bergisch Gladbach, Germany	Cat#130-093-545
MACS Separation Columns LS	Miltenyi Biotec	Bergisch Gladbach, Germany	Cat#130-042-401
MidiMACS Starting Kit (LS)	Miltenyi Biotec	Bergisch Gladbach, Germany	Cat#130-042-301
APC Annexin V	Biolegend	London, UK	Cat#640920
FcR Blocking Reagent, human	Miltenyi Biotec	Bergisch Gladbach, Germany	Cat#130-059-901
LIVE/DEAD Fixable Yellow Dead Cell Stain Kit	Invitrogen	MA, USA	Cat#L34967
LIVE/DEAD Fixable Near-IR Dead Cell Stain Kit	Invitrogen	MA, USA	Cat#L34975
MinElute PCR Purification Kit	Qiagen	Hilden, Germany	Cat#28004
Chromium™ Single Cell 3’ Library and Gel Bead Kit v2, 4 rxns	10x Genomics	CA, USA	Cat#120267
Chromium™ Single Cell A Chip Kit, 16 rxns	10x Genomics	CA, USA	Cat#1000009
Chromium™ i7 Multiplex Kit, 96 rxns	10x Genomics	CA, USA	Cat#120262
Quick Start™ Bradford 1x Dye Reagent	Bio-Rad	CA, USA	Cat#500-0205
Seahorse XF RPMI Medium pH 7.4	Agilent	CA, USA	Cat#103576-100
Seahorse XF96 Cell Culture Microplates	Agilent	CA, USA	Cat#101085-004
Seahorse XFe96 FluxPak	Agilent	CA, USA	Cat#102416-100
TapeStation HS D5000 Reagents (Sample Buffer & Ladder)	Agilent	CA, USA	Cat#5067-5593
High Sensitivity D5000 ScreenTape	Agilent	CA, USA	Cat#5067-5592
NEBNext High-Fidelity 2x PCR Master Mix	NEB	Frankfurt am Main, Germany	Cat#M0541L
Nextera XT DNA Library Preparation Kit (96 samples)	Illumina	CA, USA	Cat#FC-131-1096
2x Kapa Hifi HotStart Readymix	Kapa Biosystems	MA, USA	Cat#KK-2602
NextSeq® 500/550 High Output Kit v2.1 (75 cycles)	Illumina	CA, USA	Cat#20030410
NextSeq PhiX Control Kit	Illumina	CA, USA	Cat#FC-110-3002
NxGenTM RNase Inhibitor	Lucigen	WI, USA	Cat#F83923-1
Exonuclease I	NEB	Frankfurt am Main, Germany	Cat#M0293S
Maxima H Minus Reverse Transcriptase	Thermo Fisher	MA, USA	Cat#EPO0753
dNTP	NEB	Frankfurt am Main, Germany	Cat#N04465

## Sheet: bacterial strains
Strain	Vendor	Vendor's address	Identifier
Escherichia coli BL21 (DE3)	Merck	Darmstadt, Germany	genotype: fhuA2 [lon] ompT gal (λ DE3) [dcm] ∆hsdS λ DE3 = λ sBamHIo ∆EcoRI-B int::(lacI::PlacUV5::T7 gene1) i21 ∆nin5; Cat#69450

## Sheet: oligonucleotides
Oligonucleotide	Vendor	Vendor's address	Identifier
Tn5ME-B Oligo: 5`-GTCTCGTGGGCTCGGAGATGTGTATAAGAGACAG-3`	IDT	CA, USA	custom
Tn5MErev Oligo: 5`-[phos]CTGTCTCTTATACACATCT-3`	IDT	CA, USA	custom
TSO primer	IDT	CA, USA	custom
P5-SMART-PCR primer	IDT	CA, USA	custom
barcoded primer	IDT	CA, USA	custom
N70X Oligo	Illumina	CA, USA	custom
SMART PCR primer	Eurofins Scientific	Luxembourg	Cat#74998995
plasmid: pTXB1	NEB	Frankfurt am Main, Germany	Cat#N6707S

## Sheet: further_resources
Resource	Vendor	Vendor's address	Identifier
AMPure XP beads	Beckman Coulter	Munich, Germany	Cat#A63881
LifterSlip™	Electron Microscopy Science	PA, USA	Cat#72186-60
Polycarbonate (PCTE) membrane filters, 0.01 MICRON, 62MM X 22MM	Sterlitech	WA, USA	Cat#PCT00162X22100
mRNA Capture beads	Chemgenes	MA, USA	Cat#MACOSKO-2011-10
Dow SYLGARD™ 184 Silicone Encapsulant Clear 0.5kg kit	Dow	Wiesbaden, Germany	184 SIL ELAST KIT 0.5KG
Transwell polycarbonate membrane cell culture inserts	Corning	NY, USA	Cat#3422
